# Supplementary material for: Green, novel, and one-step synthesis of silver oxide nanoparticles: antimicrobial activity, synergism with antibiotics, and cytotoxic studies
Source: Royal Society of Chemistry journal article supplement (doi:10.1039/d2nj02902b), 2022-01-01
Supplement: d2nj02902b1.pdf [file d2nj02902b1.pdf]

### Electronic Supplementary Information

**Table S1.** Resistance profile of the set of clinical strains.

| Antibiotic                    | MIC ( $\mu\text{g/mL}$ ) |                    |                     |                      |                     |
|-------------------------------|--------------------------|--------------------|---------------------|----------------------|---------------------|
|                               | GPC                      |                    | GNB                 |                      |                     |
|                               | <i>S. aureus</i>         | <i>E. faecalis</i> | <i>A. baumannii</i> | <i>K. pneumoniae</i> | <i>P. mirabilis</i> |
| Amikacin                      | -                        | -                  | -                   | 4 (S)                | $\leq 2$ (S)        |
| Ampicillin                    | -                        | $\leq 2$ (S)       | -                   | $\geq 32$ (R)        | $\geq 32$ (R)       |
| Ampicillin/Sulbactam          | -                        | -                  | 16 (R)              | $\geq 32$ (R)        | 8 (S)               |
| Benzylpenicillin              | $\geq 0.50$ (R)          | -                  | -                   |                      |                     |
| Cefalotin                     | -                        | -                  | -                   | $\geq 64$ (R)        | $\geq 64$ (R)       |
| Cefepime                      | -                        | -                  | $\geq 64$ (R)       | 2 (R)                | $\leq 1$ (R)        |
| Cefotaxime                    | -                        | -                  | $\geq 64$ (R)       | $\geq 64$ (R)        | $\leq 1$ (R)        |
| Ceftazidime                   | -                        | -                  | $\geq 64$ (R)       | 8 (R)                | $\leq 1$ (R)        |
| Ceftriaxone                   | -                        | -                  | $\geq 64$ (R)       | $\geq 64$ (R)        | (R)                 |
| Cefuroxime                    | -                        | -                  | -                   | $\geq 64$ (R)        | $\geq 64$ (R)       |
| Ciprofloxacin                 | $\geq 8$ (R)             | $\leq 0.50$ (S)    | $\geq 4$ (R)        | $\leq 0.25$ (S)      | $\leq 0.25$ (S)     |
| Clindamycin                   | $\geq 8$ (R)             | -                  | -                   | -                    | -                   |
| Daptomycin                    | -                        | 4 (S)              | -                   | -                    | -                   |
| Doxycycline                   | -                        | 8 (I)              | -                   | -                    | -                   |
| Ertapenem                     | -                        | -                  | -                   | $\leq 0.50$ (S)      | $\leq 0.50$ (S)     |
| Erythromycin                  | $\geq 8$ (R)             | 4 (I)              | -                   | -                    | -                   |
| Gentamicin                    | $\geq 16$ (R)            | -                  | $\leq 1$ (S)        | $\geq 16$ (R)        | $\leq 1$ (S)        |
| Levofloxacin                  | $\geq 8$ (R)             | 1 (S)              | -                   | -                    | -                   |
| Linezolid                     | 1 (S)                    | 2 (S)              | -                   | -                    | -                   |
| Meropenem                     | -                        | -                  | $\geq 16$ (R)       | $\leq 0.25$ (S)      | $\leq 0.25$ (S)     |
| Moxifloxacin                  | 4 (R)                    | -                  | -                   | -                    | -                   |
| Nitrofurantoin                | 32 (S)                   | -                  | -                   |                      |                     |
| Oxacillin                     | $\geq 4$ (R)             | -                  | -                   | -                    | -                   |
| Quinupristin/Dalfopristin     | 0.50 (S)                 | -                  | -                   |                      |                     |
| Rifampicin                    | $\geq 32$ (R)            | -                  | -                   | -                    | -                   |
| Tetracycline                  | $\leq 1$ (S)             | $\geq 16$ (R)      | -                   | -                    | -                   |
| Tigecycline                   | $\leq 0.12$ (S)          | $\leq 0.12$ (S)    | -                   | -                    | -                   |
| Trimethoprim/Sulfamethoxazole | $\leq 10$ (S)            | -                  | $\leq 20$ (S)       | $\leq 20$ (S)        | $\leq 20$ (S)       |
| Vancomycin                    | $\leq 0.50$ (S)          | 1 (S)              | -                   | -                    | -                   |

GNB: Gram-negative bacillus; GPC: Gram-positive cocci.

MIC: minimum inhibitory concentration; S: susceptible; I: intermediate; R: resistant.

**Table S2.** Standardization of antimicrobial test.

| Bacteria                    | MIC QC range ( $\mu\text{g/mL}$ ) |             | Experimental MIC ( $\mu\text{g/mL}$ ) |              |
|-----------------------------|-----------------------------------|-------------|---------------------------------------|--------------|
|                             | Oxacillin                         | Ceftazidime | Oxacillin                             | Ceftazidime  |
| <i>S. aureus</i> ATCC 25923 | 0.12 – 0.50                       | -           | $0.50 \pm 0$                          | -            |
| <i>E. coli</i> ATCC 25922   | -                                 | 0.06 – 0.50 | -                                     | $0.50 \pm 0$ |

ATCC®: American Type Culture Collection; MIC: minimum inhibitory concentration; QC: quality control.

**Table S3.** Effect of the combinations among Ag<sub>2</sub>ONPs and antibiotics against reference and clinical strains.

| Bacteria                        | Drug combination MIC (µg/mL) |             | FICI        | Effect | Drug combination MIC (µg/mL) |          | FICI     | Effect |
|---------------------------------|------------------------------|-------------|-------------|--------|------------------------------|----------|----------|--------|
|                                 | Ag <sub>2</sub> ONPs         | AMP         |             |        | Ag <sub>2</sub> ONPs         | CIP      |          |        |
| <b>Reference strains</b>        |                              |             |             |        |                              |          |          |        |
| <i>S. aureus</i> ATCC 25923     | 0.24 ± 0                     | 0.50 ± 0    | 0.45 ± 0.14 | S      | 0.12 ± 0                     | 0.25 ± 0 | 0.52 ± 0 | PS     |
| <i>E. faecalis</i> ATCC 29212   | 0.97 ± 0                     | 2.00 ± 0    | 1.25 ± 0    | AD     | 0.48 ± 0                     | 1.00 ± 0 | 0.62 ± 0 | PS     |
| <i>E. coli</i> ATCC 25922       | 1.95 ± 0                     | 4.00 ± 0    | 1.83 ± 0.29 | I      | 0.01 ± 0                     | 0.02 ± 0 | 1.01 ± 0 | AD     |
| <i>P. aeruginosa</i> ATCC 27853 | 1.95 ± 0                     | 4.00 ± 0    | 3.01 ± 0    | I      | 0.01 ± 0                     | 0.02 ± 0 | 0.17 ± 0 | S      |
| <b>Clinical strains</b>         |                              |             |             |        |                              |          |          |        |
| <i>S. aureus</i>                | 0.97 ± 0                     | 2.00 ± 0    | 0.96 ± 0.29 | PS     | 0.12 ± 0                     | 0.25 ± 0 | 0.52 ± 0 | PS     |
| <i>E. faecalis</i>              | 0.97 ± 0                     | 2.00 ± 0    | 0.62 ± 0    | PS     | 0.97 ± 0                     | 2.00 ± 0 | 1.12 ± 0 | AD     |
| <i>A. baumannii</i>             | 3.26 ± 1.13                  | 6.67 ± 2.31 | 0.88 ± 0.31 | PS     | 7.81 ± 0                     | 16 ± 0   | 2.13 ± 0 | I      |
| <i>K. pneumoniae</i>            | 15.63 ± 0                    | 32 ± 0      | 2.25 ± 0    | I      | 0.06 ± 0                     | 0.13 ± 0 | 1.01 ± 0 | AD     |
| <i>P. mirabilis</i>             | 15.63 ± 0                    | 32 ± 0      | 2.25 ± 0    | I      | 0.24 ± 0                     | 0.50 ± 0 | 1.03 ± 0 | AD     |

FICI: fractional inhibitory concentration index; MIC: minimum inhibitory concentration; AMP: ampicillin; CIP: ciprofloxacin.

S: synergistic; PS: partial synergistic; AD: additive; I: indifferent; AN: antagonistic.

**Table S4.** Fold change of Ag<sub>2</sub>ONPs in combination with antibiotics against reference and clinical strains.

| Bacteria                        | Ag <sub>2</sub> ONPs MIC (µg/mL) | Ag <sub>2</sub> ONPs*-AMP MIC (µg/mL) | Fold change | Ag <sub>2</sub> ONPs*-CIP MIC (µg/mL) | Fold change |
|---------------------------------|----------------------------------|---------------------------------------|-------------|---------------------------------------|-------------|
| <b>Reference strains</b>        |                                  |                                       |             |                                       |             |
| <i>S. aureus</i> ATCC 25923     | 7.81 ± 0                         | 0.24 ± 0                              | 32.54 ± 0   | 0.12 ± 0                              | 65.08 ± 0   |
| <i>E. faecalis</i> ATCC 29212   | 3.91 ± 0                         | 0.97 ± 0                              | 4.03 ± 0    | 0.48 ± 0                              | 8.14 ± 0    |
| <i>E. coli</i> ATCC 25922       | 1.95 ± 0                         | 1.95 ± 0                              | -           | 0.01 ± 0                              | 195 ± 0     |
| <i>P. aeruginosa</i> ATCC 27853 | 0.97 ± 0                         | 1.95 ± 0                              | -           | 0.01 ± 0                              | 97 ± 0      |
| <b>Clinical strains</b>         |                                  |                                       |             |                                       |             |
| <i>S. aureus</i>                | 7.81 ± 0                         | 0.97 ± 0                              | 8.05 ± 0    | 0.12 ± 0                              | 65.08 ± 0   |
| <i>E. faecalis</i>              | 7.81 ± 0                         | 0.97 ± 0                              | 8.05 ± 0    | 0.97 ± 0                              | 8.05 ± 0    |
| <i>A. baumannii</i>             | 3.91 ± 0                         | 3.26 ± 1.13                           | 1.34 ± 0.58 | 7.81 ± 0                              | -           |
| <i>K. pneumoniae</i>            | 7.81 ± 0                         | 15.63 ± 0                             | -           | 0.06 ± 0                              | 130.16 ± 0  |
| <i>P. mirabilis</i>             | 7.81 ± 0                         | 15.63 ± 0                             | -           | 0.24 ± 0                              | 32.54 ± 0   |

MIC: minimum inhibitory concentration; AMP: ampicillin; CIP: ciprofloxacin.

\*Represents the concentration of Ag<sub>2</sub>ONPs present in the combination.

**Table S5.** Fold change of antibiotics in combination with Ag<sub>2</sub>ONPs against reference and clinical strains.

| Bacteria                        | MIC (µg/mL) |                           | Fold change  | MIC (µg/mL) |                           | Fold change |
|---------------------------------|-------------|---------------------------|--------------|-------------|---------------------------|-------------|
|                                 | AMP         | Ag <sub>2</sub> ONPs-AMP* |              | CIP         | Ag <sub>2</sub> ONPs-CIP* |             |
| <b>Reference strains</b>        |             |                           |              |             |                           |             |
| <i>S. aureus</i> ATCC 25923     | 1.33 ± 0.58 | 0.50 ± 0                  | 2.67 ± 1.15  | 0.50 ± 0    | 0.25 ± 0                  | 2.00 ± 0    |
| <i>E. faecalis</i> ATCC 29212   | 2.00 ± 0    | 2.00 ± 0                  | -            | 2.00 ± 0    | 1.00 ± 0                  | 2.00 ± 0    |
| <i>E. coli</i> ATCC 25922       | 5.33 ± 2.31 | 4.00 ± 0                  | 1.33 ± 0.58  | 0.02 ± 0    | 0.02 ± 0                  | -           |
| <i>P. aeruginosa</i> ATCC 27853 | 4.00 ± 0    | 4.00 ± 0                  | -            | 0.13 ± 0    | 0.02 ± 0                  | 6.50 ± 0    |
| <b>Clinical strains</b>         |             |                           |              |             |                           |             |
| <i>S. aureus</i>                | 2.67 ± 1.15 | 2.00 ± 0                  | 1.33 ± 0.58  | 0.50 ± 0    | 0.25 ± 0                  | 2.00 ± 0    |
| <i>E. faecalis</i>              | 4.00 ± 0    | 2.00 ± 0                  | 2.00 ± 0     | 2.00 ± 0    | 2.00 ± 0                  | -           |
| <i>A. baumannii</i>             | > 128 ± 0   | 6.67 ± 2.31               | 21.33 ± 9.24 | > 128 ± 0   | 16 ± 0                    | 8.00 ± 0    |
| <i>K. pneumoniae</i>            | > 128 ± 0   | 32 ± 0                    | 4.00 ± 0     | 0.13 ± 0    | 0.13 ± 0                  | -           |
| <i>P. mirabilis</i>             | > 128 ± 0   | 32 ± 0                    | 4.00 ± 0     | 0.50 ± 0    | 0.50 ± 0                  | -           |

MIC: minimum inhibitory concentration; AMP: ampicillin; CIP: ciprofloxacin.

\*Represents the concentration of antibiotic (AMP or CIP) present in the combination.

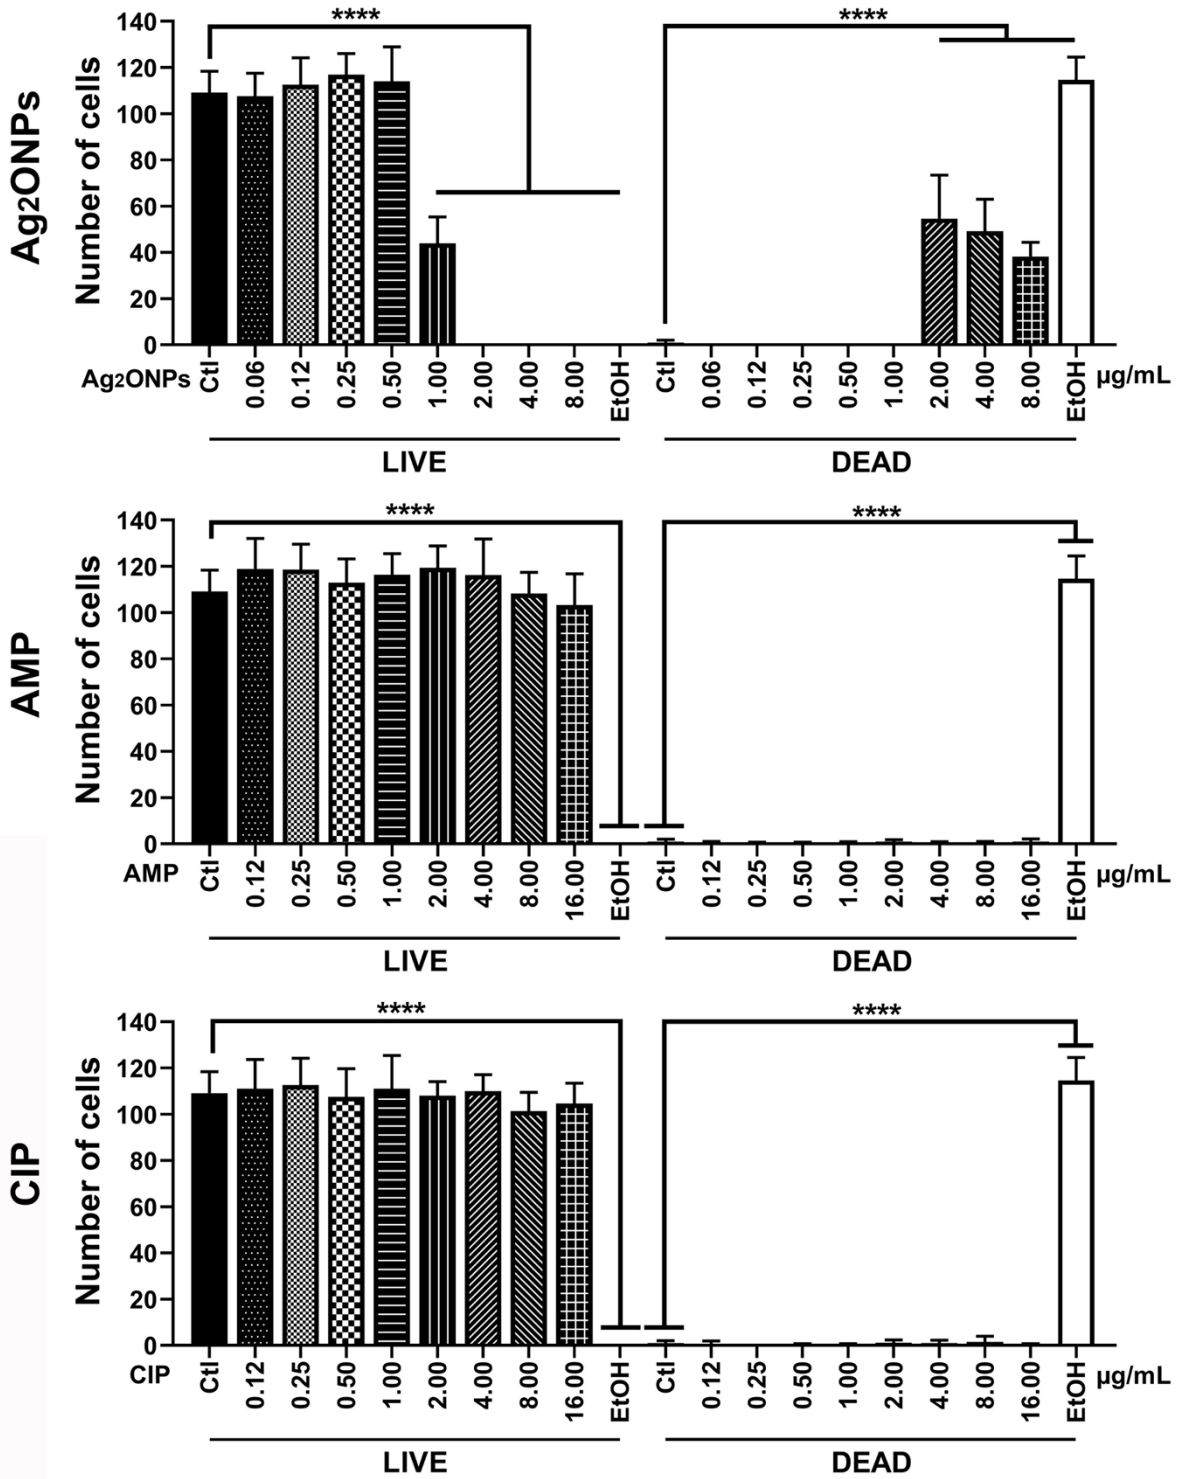

Figure Supplementary 1.- Cell viability of HDF exposed to individual treatments. a) Total number of cells (live and dead). b) Cell viability percentage for each experimental condition. \*\*\*\*p < 0.0001 vs control (untreated cells); ANOVA, Tukey post-hoc. HDF: human dermal fibroblasts; AMP: ampicillin; CIP: ciprofloxacin; EtOH: 70 % ethanol.
